# Supplementary material for: Metabolomic and flux-balance analysis of age-related decline of hypoxia tolerance in Drosophila muscle tissue
Source: PubMed Central journal article supplement — Mol Syst Biol. 2008 Dec 16;4:233. doi: 10.1038/msb.2008.71 (PMC2615305; doi:10.1038/msb.2008.71), 2008-12-16
Supplement: msb200871-s1.pdf [file msb200871-s1.pdf]

## Supplementary Material

### Table of Contents:

1. Table I-S: Metabolite relative concentrations in 3 day-old male thoraxes
2. Table II-S: Metabolite relative concentrations in 40 day-old male thoraxes
3. Table III-S: *p*-values for t-tests
4. Table IV-S: Scaling factors for metabolites included in the model
5. Figure 1-S: Example <sup>1</sup>H NMR spectra
6. Figure 2-S: Complete map of metabolic reconstruction
7. SBML model files: “3d hypoxia.xml”  
“3d recovery.xml”  
“40d hypoxia.xml”  
“40d recovery.xml”
8. Model reaction list: “model\_reactions.xls”
9. Raw NMR and Bradford assay data: “aging\_hypoxia\_NMR.xls”

**Table I-S: Metabolite relative concentrations in 3 day-old male thoraxes**

|                           | <b>3 day-old males</b> |                |                 |
|---------------------------|------------------------|----------------|-----------------|
|                           | <i>Control</i>         | <i>Hypoxia</i> | <i>Recovery</i> |
| <b>2-phosphoglycerate</b> | 0.3223± 0.0377         | 0.2071± 0.0365 | 0.1239± 0.0109  |
| <b>4-aminobutyrate</b>    | 0.0369± 0.0038         | 0.0541± 0.0071 | 0.029± 0.002    |
| <b>Acetate</b>            | 0.0915± 0.0154         | 0.3517± 0.0467 | 0.5797± 0.0434  |
| <b>Alanine</b>            | 0.1733± 0.0155         | 0.4426± 0.0504 | 0.2573± 0.027   |
| <b>Arginine</b>           | 0.1206± 0.0142         | 0.1821± 0.013  | 0.1023± 0.0139  |
| <b>Asparagine</b>         | 0.0236± 0.0015         | 0.0336± 0.0073 | 0.018± 0.0023   |
| <b>β-Alanine</b>          | 0.2623± 0.0294         | 0.3444± 0.0298 | 0.2966± 0.0187  |
| <b>Carnitine</b>          | 0.0258± 0.0044         | 0.0309± 0.0043 | 0.0294± 0.0026  |
| <b>Choline</b>            | 0.0222± 0.0032         | 0.0171± 0.0019 | 0.008± 0.0005   |
| <b>Cysteine</b>           | 0.0199± 0.0024         | 0.035± 0.0045  | 0.0185± 0.0018  |
| <b>Glucose</b>            | 0.2407± 0.0269         | 0.3635± 0.059  | 0.2488± 0.0207  |
| <b>Glutamate</b>          | 0.1638± 0.0134         | 0.2118± 0.0157 | 0.0608± 0.0055  |
| <b>Glutamine</b>          | 0.1396± 0.0102         | 0.1865± 0.0185 | 0.1053± 0.0102  |
| <b>Glycerate</b>          | 0.0386± 0.0046         | 0.0442± 0.0075 | 0.0251± 0.0026  |
| <b>Glycine</b>            | 0.0277± 0.0032         | 0.048± 0.0049  | 0.0274± 0.0017  |
| <b>Histidine</b>          | 0.0562± 0.0078         | 0.0752± 0.014  | 0.0426± 0.0047  |
| <b>Homoserine</b>         | 0.0928± 0.0053         | 0.1307± 0.0186 | 0.0517± 0.0031  |
| <b>Lactate</b>            | 0.1123± 0.0091         | 0.2649± 0.0639 | 0.1286± 0.0113  |
| <b>Lysine</b>             | 0.0199± 0.0024         | 0.0435± 0.0087 | 0.0203± 0.0021  |
| <b>O-Phosphocholine</b>   | 0.1353± 0.0132         | 0.1443± 0.0153 | 0.0822± 0.008   |
| <b>Oxalacetate</b>        | 0.1496± 0.0182         | 0.133± 0.0197  | 0.2185± 0.0051  |
| <b>Proline</b>            | 0.1263± 0.0111         | 0.1276± 0.0115 | 0.1166± 0.0075  |
| <b>Pyruvate</b>           | 0.0157± 0.0019         | 0.0242± 0.0021 | 0.0229± 0.0017  |
| <b>Sarcosine</b>          | 0.0359± 0.0054         | 0.0452± 0.0037 | 0.0269± 0.0015  |
| <b>Serine</b>             | 0.1383± 0.0194         | 0.118± 0.0145  | 0.0788± 0.0038  |
| <b>Taurine</b>            | 0.1631± 0.0227         | 0.1292± 0.0119 | 0.0957± 0.0104  |
| <b>Threonine</b>          | 0.0322± 0.004          | 0.05± 0.0104   | 0.0357± 0.0058  |

\* Concentrations in this table are expressed in μmol/mg protein and are shown as mean ± SEM ( n= 5 experiments).

**Table II-S: Metabolite relative concentrations in 40 day-old male thoraxes**

|                           | <b>40 day-old males</b> |                |                 |
|---------------------------|-------------------------|----------------|-----------------|
|                           | <i>Control</i>          | <i>Hypoxia</i> | <i>Recovery</i> |
| <b>2-phosphoglycerate</b> | 0.3436± 0.052           | 0.3034± 0.024  | 0.1378± 0.0102  |
| <b>4-aminobutyrate</b>    | 0.0444± 0.0056          | 0.0635± 0.0066 | 0.0255± 0.002   |
| <b>Acetate</b>            | 0.0816± 0.0197          | 0.3987± 0.0616 | 1.5526± 0.148   |
| <b>Alanine</b>            | 0.1901± 0.0234          | 0.4098± 0.0371 | 0.2286± 0.0201  |
| <b>Arginine</b>           | 0.1817± 0.0263          | 0.1925± 0.0117 | 0.0922± 0.0146  |
| <b>Asparagine</b>         | 0.0304± 0.003           | 0.0355± 0.0033 | 0.0167± 0.0018  |
| <b>β-Alanine</b>          | 0.3921± 0.0506          | 0.38± 0.0363   | 0.27± 0.0238    |
| <b>Carnitine</b>          | 0.0302± 0.0048          | 0.0243± 0.0017 | 0.0226± 0.0024  |
| <b>Choline</b>            | 0.0097± 0.0017          | 0.0111± 0.0011 | 0.0083± 0.0013  |
| <b>Cysteine</b>           | 0.03± 0.0031            | 0.0408± 0.0092 | 0.0235± 0.0029  |
| <b>Glucose</b>            | 0.3717± 0.0441          | 0.3445± 0.032  | 0.1731± 0.0259  |
| <b>Glutamate</b>          | 0.1961± 0.0164          | 0.2499± 0.0132 | 0.063± 0.007    |
| <b>Glutamine</b>          | 0.2551± 0.0318          | 0.1703± 0.0082 | 0.0758± 0.014   |
| <b>Glycerate</b>          | 0.0434± 0.004           | 0.0546± 0.0044 | 0.0284± 0.003   |
| <b>Glycine</b>            | 0.0362± 0.0043          | 0.0451± 0.0034 | 0.0292± 0.0029  |
| <b>Histidine</b>          | 0.0573± 0.0063          | 0.075± 0.0095  | 0.0362± 0.0047  |
| <b>Homoserine</b>         | 0.1086± 0.0084          | 0.1523± 0.009  | 0.0577± 0.004   |
| <b>Lactate</b>            | 0.1107± 0.0063          | 0.4365± 0.0313 | 0.2183± 0.0078  |
| <b>Lysine</b>             | 0.0296± 0.004           | 0.04± 0.0035   | 0.021± 0.0018   |
| <b>O-Phosphocholine</b>   | 0.1542± 0.0211          | 0.162± 0.0167  | 0.074± 0.0067   |
| <b>Oxalacetate</b>        | 0.1042± 0.0125          | 0.126± 0.0102  | 0.2861± 0.0197  |
| <b>Proline</b>            | 0.1816± 0.018           | 0.1384± 0.0148 | 0.0844± 0.0127  |
| <b>Pyruvate</b>           | 0.0301± 0.0062          | 0.0441± 0.0036 | 0.0386± 0.0196  |
| <b>Sarcosine</b>          | 0.0425± 0.0054          | 0.0586± 0.0046 | 0.0247± 0.0016  |
| <b>Serine</b>             | 0.1771± 0.0196          | 0.1566± 0.0163 | 0.0782± 0.0053  |
| <b>Taurine</b>            | 0.1109± 0.0135          | 0.1589± 0.0191 | 0.1158± 0.0207  |
| <b>Threonine</b>          | 0.0245± 0.0017          | 0.0964± 0.0136 | 0.0364± 0.0019  |

\*: Concentrations in this table are expressed in  $\mu\text{mol}/\text{mg}$  protein and are shown as mean  $\pm$  SEM (n= 5 experiments).

Table III-S: *p*-values for t-tests

|                           | <b>Control<br/>40days/Control<br/>3days</b> | <b>Hypoxia<br/>40days/Hypoxia<br/>3days</b> | <b>Recovery 40days/<br/>Recovery 3days</b> |
|---------------------------|---------------------------------------------|---------------------------------------------|--------------------------------------------|
|                           | <i>p values<br/>(low confidence)</i>        | <i>p values<br/>(low confidence)</i>        | <i>p values<br/>(low confidence)</i>       |
| <b>2-phosphoglycerate</b> | 0.7488                                      | 0.0588                                      | 0.3842                                     |
| <b>4-aminobutyrate</b>    | 0.3091                                      | 0.3598                                      | 0.2569                                     |
| <b>Acetate</b>            | 0.7036                                      | 0.5604                                      | <b>0.0002*</b>                             |
| <b>Alanine</b>            | 0.5676                                      | 0.6152                                      | 0.4208                                     |
| <b>Arginine</b>           | 0.0754                                      | 0.5685                                      | 0.628                                      |
| <b>Asparagine</b>         | 0.0857                                      | 0.8196                                      | 0.6776                                     |
| <b>β-Alanine</b>          | 0.0578                                      | 0.4701                                      | 0.405                                      |
| <b>Carnitine</b>          | 0.5181                                      | 0.1994                                      | 0.0937                                     |
| <b>Choline</b>            | <b>0.0094</b>                               | <b>0.0322</b>                               | 0.8672                                     |
| <b>Cysteine</b>           | <b>0.0335</b>                               | 0.589                                       | 0.1872                                     |
| <b>Glucose</b>            | <b>0.0351</b>                               | 0.7848                                      | 0.0524                                     |
| <b>Glutamate</b>          | 0.1678                                      | 0.1013                                      | 0.8123                                     |
| <b>Glutamine</b>          | <b>0.0086</b>                               | 0.4487                                      | 0.1289                                     |
| <b>Glycerate</b>          | 0.4647                                      | 0.2676                                      | 0.439                                      |
| <b>Glycine</b>            | 0.1533                                      | 0.6397                                      | 0.6185                                     |
| <b>Histidine</b>          | 0.919                                       | 0.9918                                      | 0.3702                                     |
| <b>Homoserine</b>         | 0.1531                                      | 0.3267                                      | 0.2727                                     |
| <b>Lactate</b>            | 0.8855                                      | <b>0.0425</b>                               | <b>0.0002*</b>                             |
| <b>Lysine</b>             | 0.0748                                      | 0.7172                                      | 0.8263                                     |
| <b>O-Phosphocholine</b>   | 0.4705                                      | 0.4591                                      | 0.4625                                     |
| <b>Oxalacetate</b>        | 0.0744                                      | 0.7601                                      | <b>0.0106</b>                              |
| <b>Proline</b>            | <b>0.0311</b>                               | 0.5817                                      | 0.061                                      |
| <b>Pyruvate</b>           | 0.0594                                      | <b>0.0015*</b>                              | 0.4472                                     |
| <b>Sarcosine</b>          | 0.4161                                      | 0.0553                                      | 0.3497                                     |
| <b>Serine</b>             | 0.1977                                      | 0.1156                                      | 0.9225                                     |
| <b>Taurine</b>            | 0.0837                                      | 0.2237                                      | 0.4125                                     |
| <b>Threonine</b>          | 0.1212                                      | <b>0.0267</b>                               | 0.9201                                     |

\*Indicates *p* values that are statistically significant after Bonferroni correction. ( $p < 0.05$ )

Bold indicates  $p < 0.05$

**Table IV-S: Scaling factors for metabolites included in the model**

|                        | [Std] <sub>solution</sub> (μM) | [Std] <sub>Chenomix</sub> (μM) | Mean Scaling factor |
|------------------------|--------------------------------|--------------------------------|---------------------|
| <b>4-aminobutyrate</b> | 1000                           | 866.5                          | 1.13                |
| <b>Acetate</b>         | 1000                           | 762.4                          | 1.27                |
| <b>Alanine</b>         | 1000                           | 514.7                          | 1.98                |
| <b>Glucose</b>         | 1000                           | 467.1                          | 2.14                |
| <b>Glutamate</b>       | 1000                           | 872.3                          | 1.16                |
| <b>Glutamine</b>       | 1000                           | 955.0                          | 1.08                |
| <b>Lactate</b>         | 1000                           | 735.1                          | 1.34                |
| <b>Oxaloacetate</b>    | 1000                           | 276.4                          | 3.42                |
| <b>Proline</b>         | 1000                           | 879.6                          | 1.13                |
| <b>Pyruvate</b>        | 1000                           | 925.8                          | 1.15                |

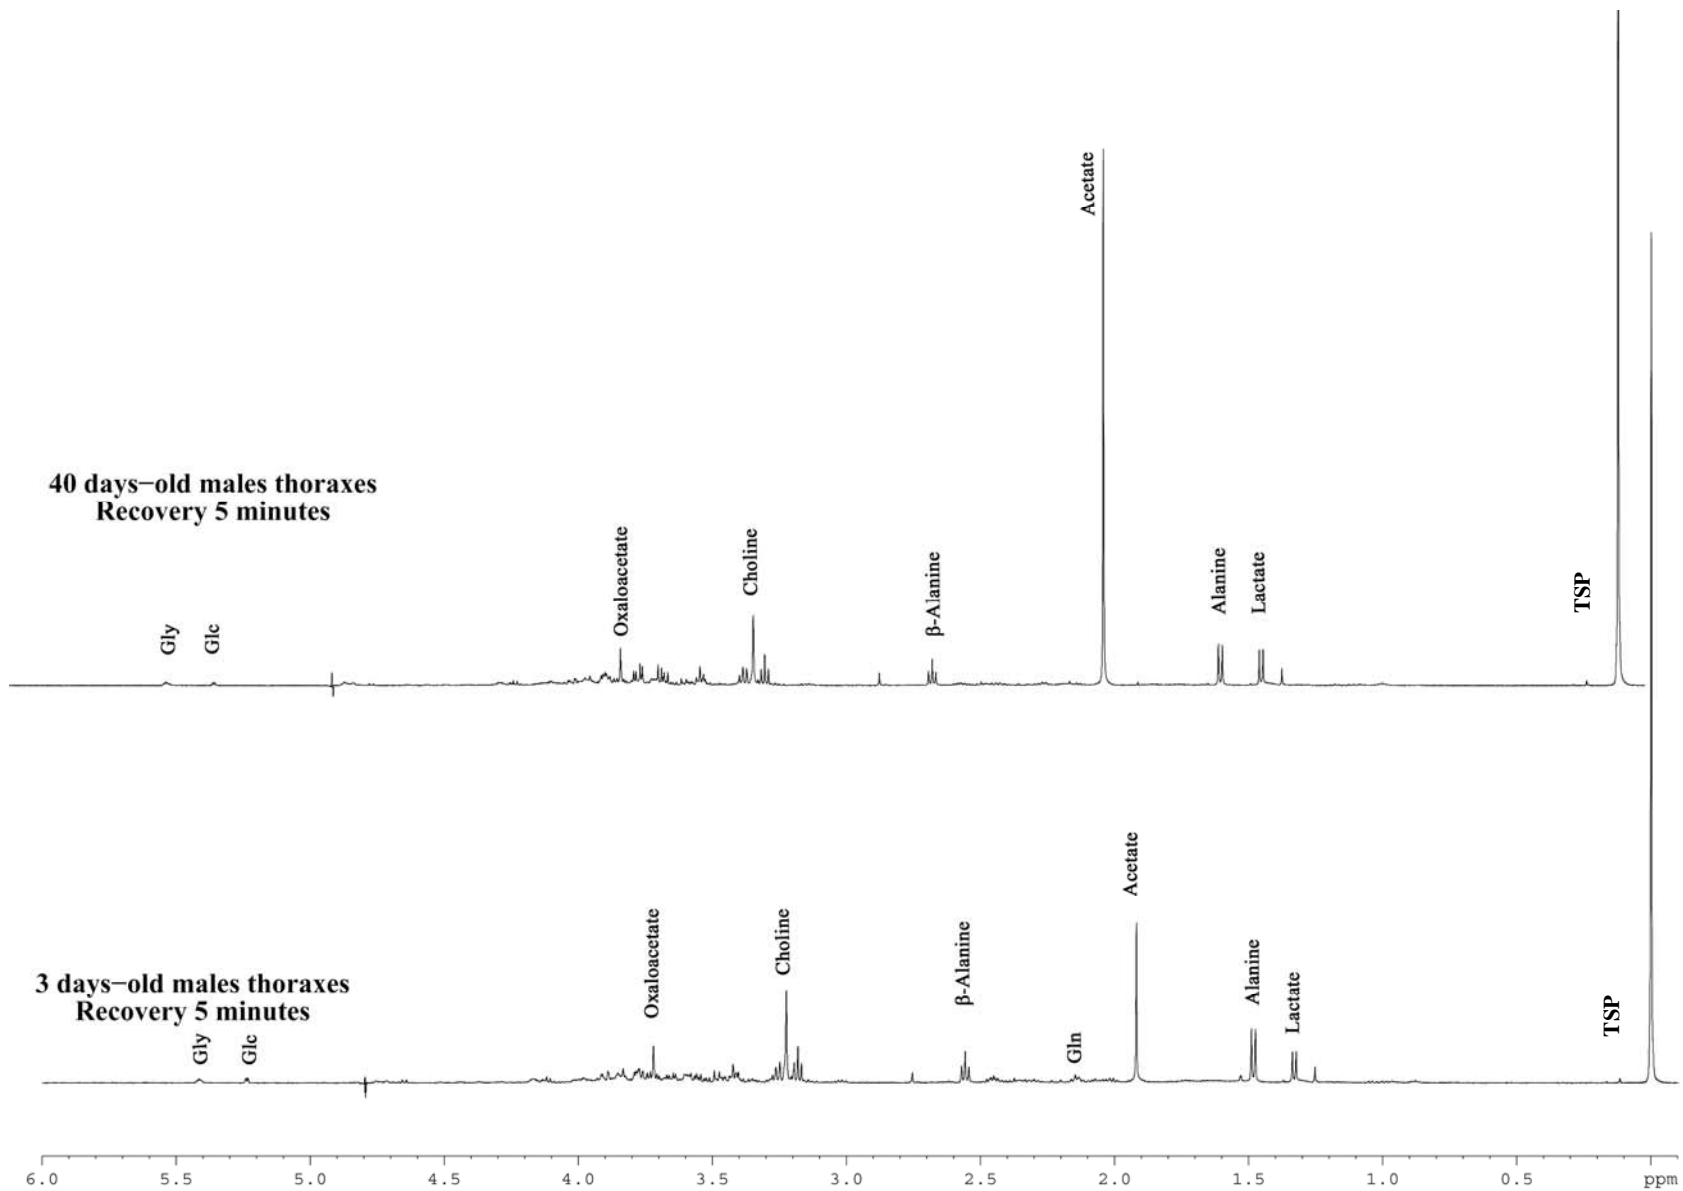

**Figure 1-S:** <sup>1</sup>H spectra of 40d-old and 3d-old male thoraxes after 5 minutes recovery. Gly: Glycogen, Glc: Glucose, Gln: Glutamine.

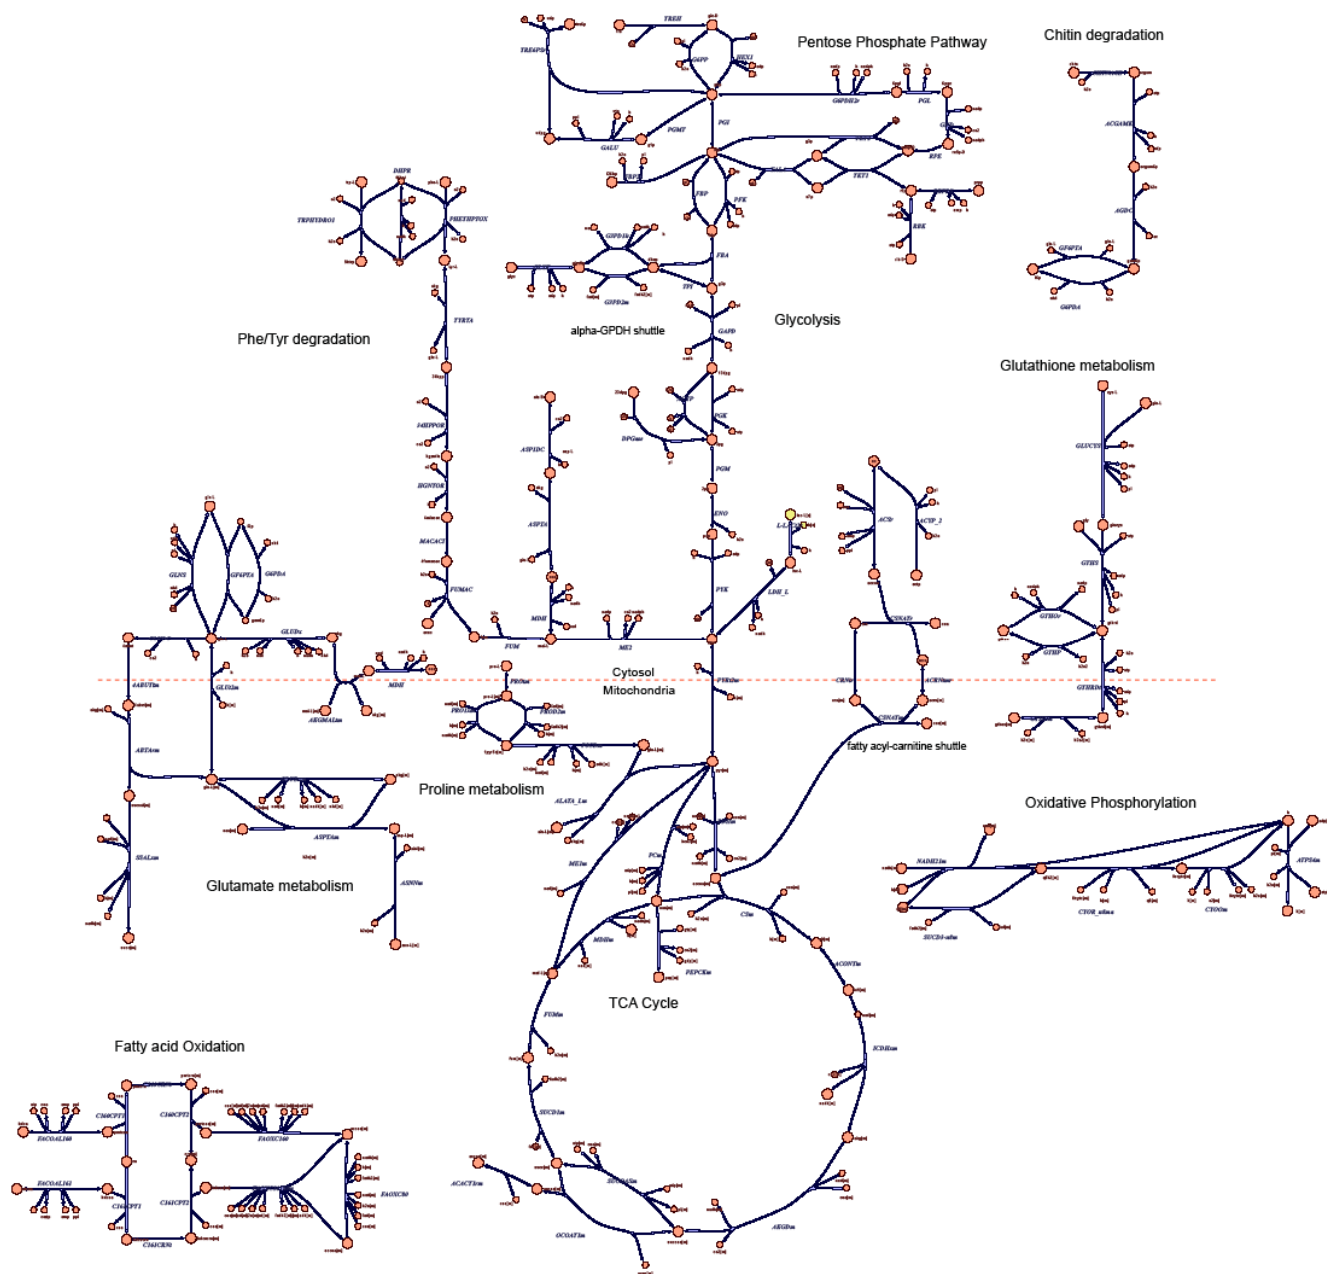

**Figure 2-S:** Complete map of the metabolic network model, including pathways unused by the simulation such as pentose phosphate pathway, fatty acid oxidation, chitin degradation, and phenylalanine/tyrosine degradation
